# Supplementary material for: Protection of UVB-Induced Photoaging by Fuzhuan-Brick Tea Aqueous Extract via MAPKs/Nrf2-Mediated Down-Regulation of MMP-1
Source: Nutrients. 2018 Dec 28;11(1):60. doi: 10.3390/nu11010060 (PMC6357030; doi:10.3390/nu11010060)
Supplement: Supplementary file 1 [file nutrients-11-00060-s001.pdf]

## SUPPLEMENTARY DATA SHEETS

# Protection of UVB-Induced Photoaging by Fuzhuan-Brick Tea Aqueous Extract via MAPKs/*Nrf2*-Mediated Down-Regulation of MMP-1

Peijun Zhao <sup>1,†</sup>, Md Badrul Alam <sup>1,2,†</sup> and Sang-Han Lee <sup>1,2,\*</sup>

<sup>1</sup>Department of Food Science and Biotechnology, Graduate School, Kyungpook National University, Daegu 41566, Republic of Korea

<sup>2</sup>Food and Bio-Industry Research Institute, Inner Beauty/Antiaging Center, Kyungpook National University, Daegu 41566, Republic of Korea

† These authors contributed equally to this work.

**Running head:** Attenuation of photo-aging by Fuzhuan-brick tea

**Corresponding authors:**

Dr. Sang Han Lee; E-mail: [sang@knu.ac.kr](mailto:sang@knu.ac.kr)

## 2. Materials and Methods

### 2.1. Drugs and chemicals

2,2-Diphenyl-1-picrylhydrazyl (DPPH), neucapriner, 2,20-azino-bis(3-ethylbenzothiazoline-6-sulphonic acid) (ABTS), 2',7'-dichlorofluorescein diacetate (DCFH-DA), 3-(4,5-dimethylthiazol-2-yl)-2,5-diphenyltetrazolium bromide (MTT), and dimethylsulfoxide (DMSO) were purchased from Sigma Aldrich (St. Louis, MO, USA). Dulbecco's modified Eagle's medium (DMEM), fetal bovine serum (FBS), penicillin-streptomycin mixture (P/S), and 0.25% trypsin-EDTA were purchased from Gibco-BRL Life Technologies (Grand Island, NY, USA). All antibodies anti-SOD1, anti-CAT, anti-GPx-1, anti-HO-1, anti-MMP-1, anti-type I procollagen, and anti-Nrf2 were purchased from Santa Cruz Biotechnology (Santa Cruz, CA, USA) as described in Table S2.

### 2.2. High-performance liquid chromatographic (HPLC) analysis

Phytochemical characterization of FBTA, including standard molecules (gallic acid, theaflavins, theobromine, epigallocatechin, caffeine, epicatechin and epigallocatechingallate (EGCG)) was performed using an auto-sampler HPLC (HPLC-DAD) setup (Shimadzu, Japan) supported with a diode array detector (SPD-M20A) and LC solution software (ver. 1.22 SP1). A 5  $\mu$ m-diameter particles packed C18 column (4.6  $\times$  250 mm) was used for reverse-phase chromatographic analysis. The following gradient solvent system [acetonitrile (A) and 1% formic acid (B)] was employed with change in ratio at every time (min); solvent A (10%) was run up to 10 min, followed by 30, 50, 60, 90, and 20% for 15, 20, 25, 30, 35, and 40 min, respectively ( $\lambda$  = 280 nm). The injection volume was 20  $\mu$ L, and the flow rate was maintained at 0.8 mL/min [1]. The phenolic components were identified based on the retention time compared with those of standard compounds.

**Table S2: List of the primer sets used in this study.**

| <i>Gene name</i> |                | <i>Sequences</i>            |
|------------------|----------------|-----------------------------|
| <i>Hmox-1</i>    | <i>forward</i> | <i>ACGCATATACCCGCTACCTG</i> |
|                  | <i>reverse</i> | <i>TCCTCTGTCAGCATCACCTG</i> |
| <i>Nrf-2</i>     | <i>forward</i> | <i>ACATCCTTTGGAGGCAAGAC</i> |
|                  | <i>reverse</i> | <i>GGGAATGTCTCTGCCAAAAG</i> |
| <i>Gapdh</i>     | <i>Forward</i> | <i>TTGTGATGGGTGTGAACCAC</i> |
|                  | <i>reverse</i> | <i>ACACATTGGGGGTAGGAACA</i> |

**Table S2: List of antibodies used in this study.**

| <i>Name</i>      | <i>Catalog number</i> | <i>Company</i>                 | <i>Antigen</i> | <i>Host</i> |
|------------------|-----------------------|--------------------------------|----------------|-------------|
| Anti-SOD1        | sc-101523             | Santa Cruz Biotechnology, Inc. | SOD1           | Mouse       |
| Anti-CAT         | sc-515782             | Santa Cruz Biotechnology, Inc. | CAT            | Mouse       |
| Anti-GPx-1       | sc-133160             | Santa Cruz Biotechnology, Inc. | GPx-1          | Mouse       |
| Anti-HO-1        | sc-136256             | Santa Cruz Biotechnology, Inc. | HO-1           | Mouse       |
| Anti <i>Nrf2</i> | sc-81342              | Santa Cruz Biotechnology, Inc. | <i>Nrf2</i>    | Mouse       |
| Anti-p-p38       | sc-166182             | Santa Cruz Biotechnology, Inc. | p38            | Mouse       |
| Anti-p38         | BS3567                | Bioworld Technology, Inc.      | p38            | Rabbit      |
| Anti-p-ERK1/2    | sc-7383               | Santa Cruz Biotechnology, Inc. | ERK            | Mouse       |
| Anti-ERK1/2      | BS 6472               | Bioworld Technology, Inc.      | ERK            | Rabbit      |
| Anti-p-JNK       | BS 4322               | Bioworld Technology, Inc.      | JNK            | Rabbit      |
| Anti-JNK         | sc-7345               | Santa Cruz Biotechnology, Inc. | JNK            | Mouse       |
| Anti-MMP1        | sc-21731              | Santa Cruz Biotechnology, Inc. | MMP-1          | Mouse       |

|                         |           |                                |                |       |
|-------------------------|-----------|--------------------------------|----------------|-------|
| Anti-type I Procollagen | sc-376350 | Santa Cruz Biotechnology, Inc. | COL1A2         | Mouse |
| Anti-Lamin B            | Sc-6217   | Santa Cruz Biotechnology, Inc. | Lamin B        | Goat  |
| Anti- $\beta$ actin     | Sc-47778  | Santa Cruz Biotechnology, Inc. | $\beta$ -actin | Mouse |

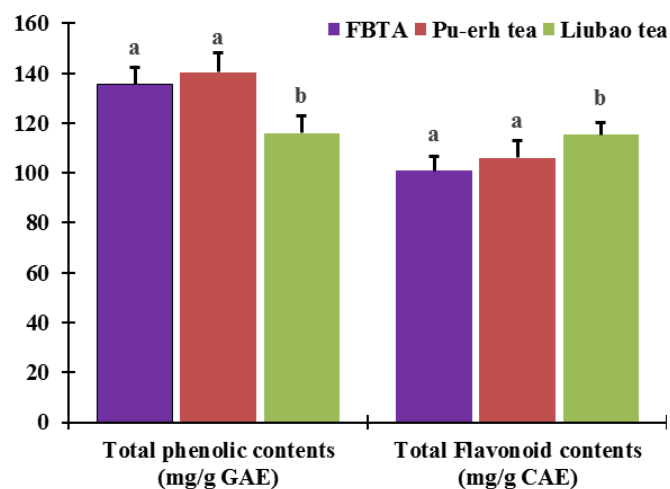

**Figure S1.** Total phenolic and flavonoid contents of the aqueous extract of Fuzhuan-brick tea, pu-erh tea and libao tea. The different letter in the same group indicate the difference between the teas is significant.

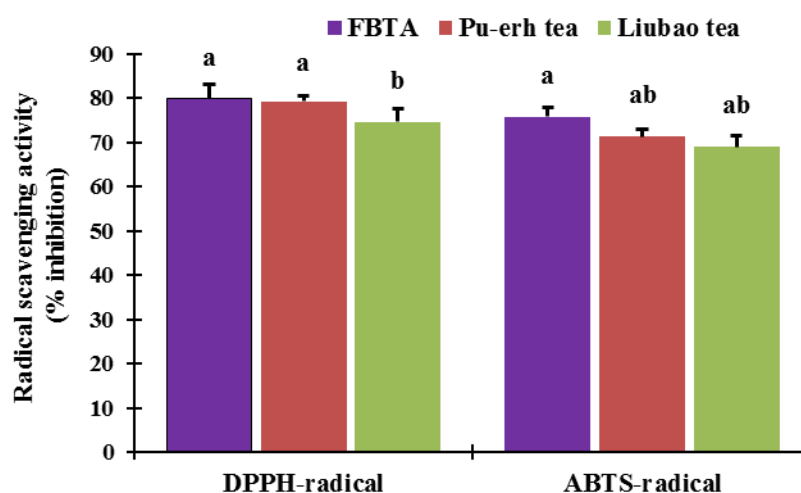

**Figure S2.** DPPH- and ABTS-radical scavenging activities of the aqueous extract of Fuzhuan-brick tea, pu-erh tea and libao tea. The different letter in the same group indicate the difference between the teas is significant.

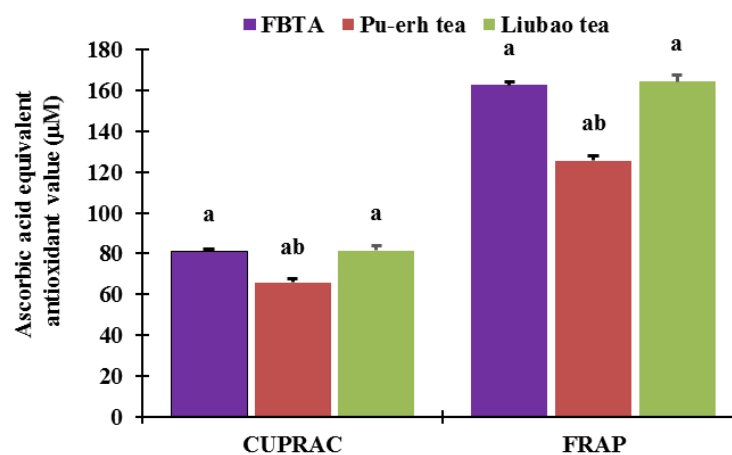

**Figure S3.** Reducing power activities of the aqueous extract of Fuzhuan-brick tea, pu-erh tea and libao tea in CUPRAC and FRAP assays. The different letters in the same group indicate the difference between the teas is significant.

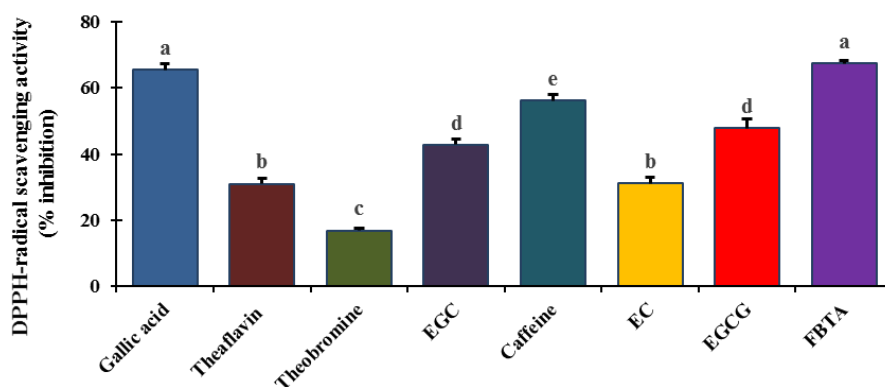

**Figure S4.** DPPH-radical scavenging activities of the aqueous extract of Fuzhuan-brick tea (FBTA) and the identified constituents at their putative concentrations in FBTA. The different letters indicate the difference between the constituents is significant ( $p < 0.05$ ). The experimental concentration of gallic acid (10  $\mu\text{mol/L}$ ), theaflavins (2  $\mu\text{mol/L}$ ), theobromine (2  $\mu\text{mol/L}$ ), EGC (4  $\mu\text{mol/L}$ ), caffeine (15  $\mu\text{mol/L}$ ), EC (2  $\mu\text{mol/L}$ ), EGCG (2  $\mu\text{mol/L}$ ) and FBTA (100  $\mu\text{g/mL}$ ).

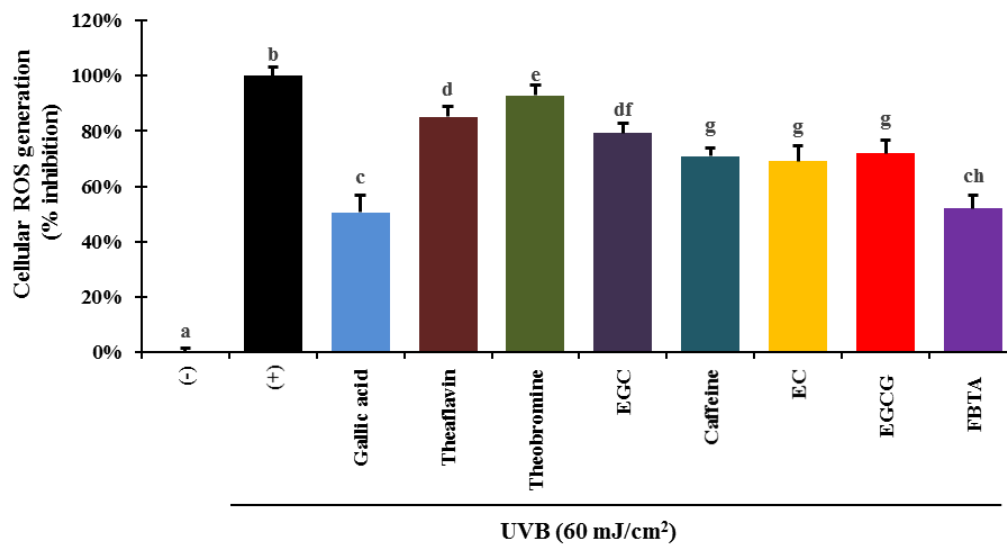

**Figure S5.** Cellular ROS quenching effects of the aqueous extract of Fuzhuan-brick tea (FBTA) and the identified constituents at their putative concentration in FBTA. The experimental concentration of gallic acid (10  $\mu\text{mol/L}$ ), theaflavins (2  $\mu\text{mol/L}$ ), theobromine (2  $\mu\text{mol/L}$ ), EGC (4  $\mu\text{mol/L}$ ), caffeine (15  $\mu\text{mol/L}$ ), EC (2  $\mu\text{mol/L}$ ), EGCG (2  $\mu\text{mol/L}$ ) and FBTA (100  $\mu\text{g/mL}$ ). Different letter of each column are significant ( $p < 0.05$ ).

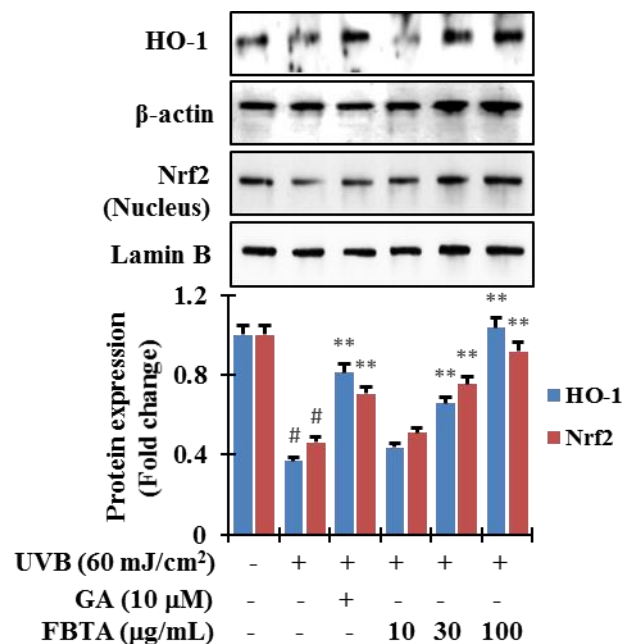

**Figure S6.** Effects of Fuzhuan-brick tea aqueous extract on *Nrf2* signaling. FBTA-pretreated HaCaT cells were exposed with UVB (60 mJ/cm²), and the protein expressions of HO-1 and

*Nrf2* were detected by western blotting. # $p < 0.01$ , compared to the normal cells, \*\* $p < 0.05$ , compared to UVB-irradiated cells.

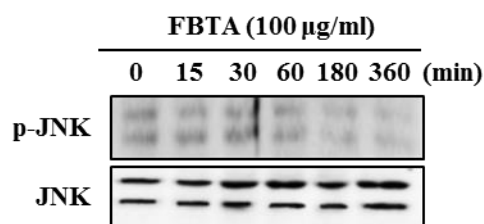

**Figure S7.** Effects of Fuzhuan-brick tea aqueous extract on the activation of JNK. HaCaT cells were treated with FBTA (100 µg/mL) for indicated time points and the activated and non-activated forms of JNK were identified by immunoblotting assay.

## References

- [1]. S.M. Brito, S.M.; Coutinho, H.D.; Talvani, A.; Coronel, C.; Barbosa, A.G.; Vega, C. Analysis of bioactivities and chemical composition of *Ziziphus joazeiro* Mart. using HPLC–DAD. Food Chem. **2015**, *186*, 185-191.
